# Supplementary material for: Circadian disruption enhances HSF1 signaling and tumorigenesis in Kras-driven lung cancer
Source: PubMed Central journal article supplement — Sci Adv. 2022 Sep 28;8(39):eabo1123. doi: 10.1126/sciadv.abo1123 (PMC9519049; doi:10.1126/sciadv.abo1123), 2022-09-28
Supplement: sciadv.abo1123_sm.pdf [file sciadv.abo1123_sm.pdf]

Supplementary Materials for  
**Circadian disruption enhances HSF1 signaling and tumorigenesis in  
*Kras*-driven lung cancer**

Marie Pariollaud *et al.*

Corresponding author: Katja A. Lamia, [klamia@scripps.edu](mailto:klamia@scripps.edu)

*Sci. Adv.* **8**, eabo1123 (2022)  
DOI: 10.1126/sciadv.abo1123

**This PDF file includes:**

Figs. S1 to S13

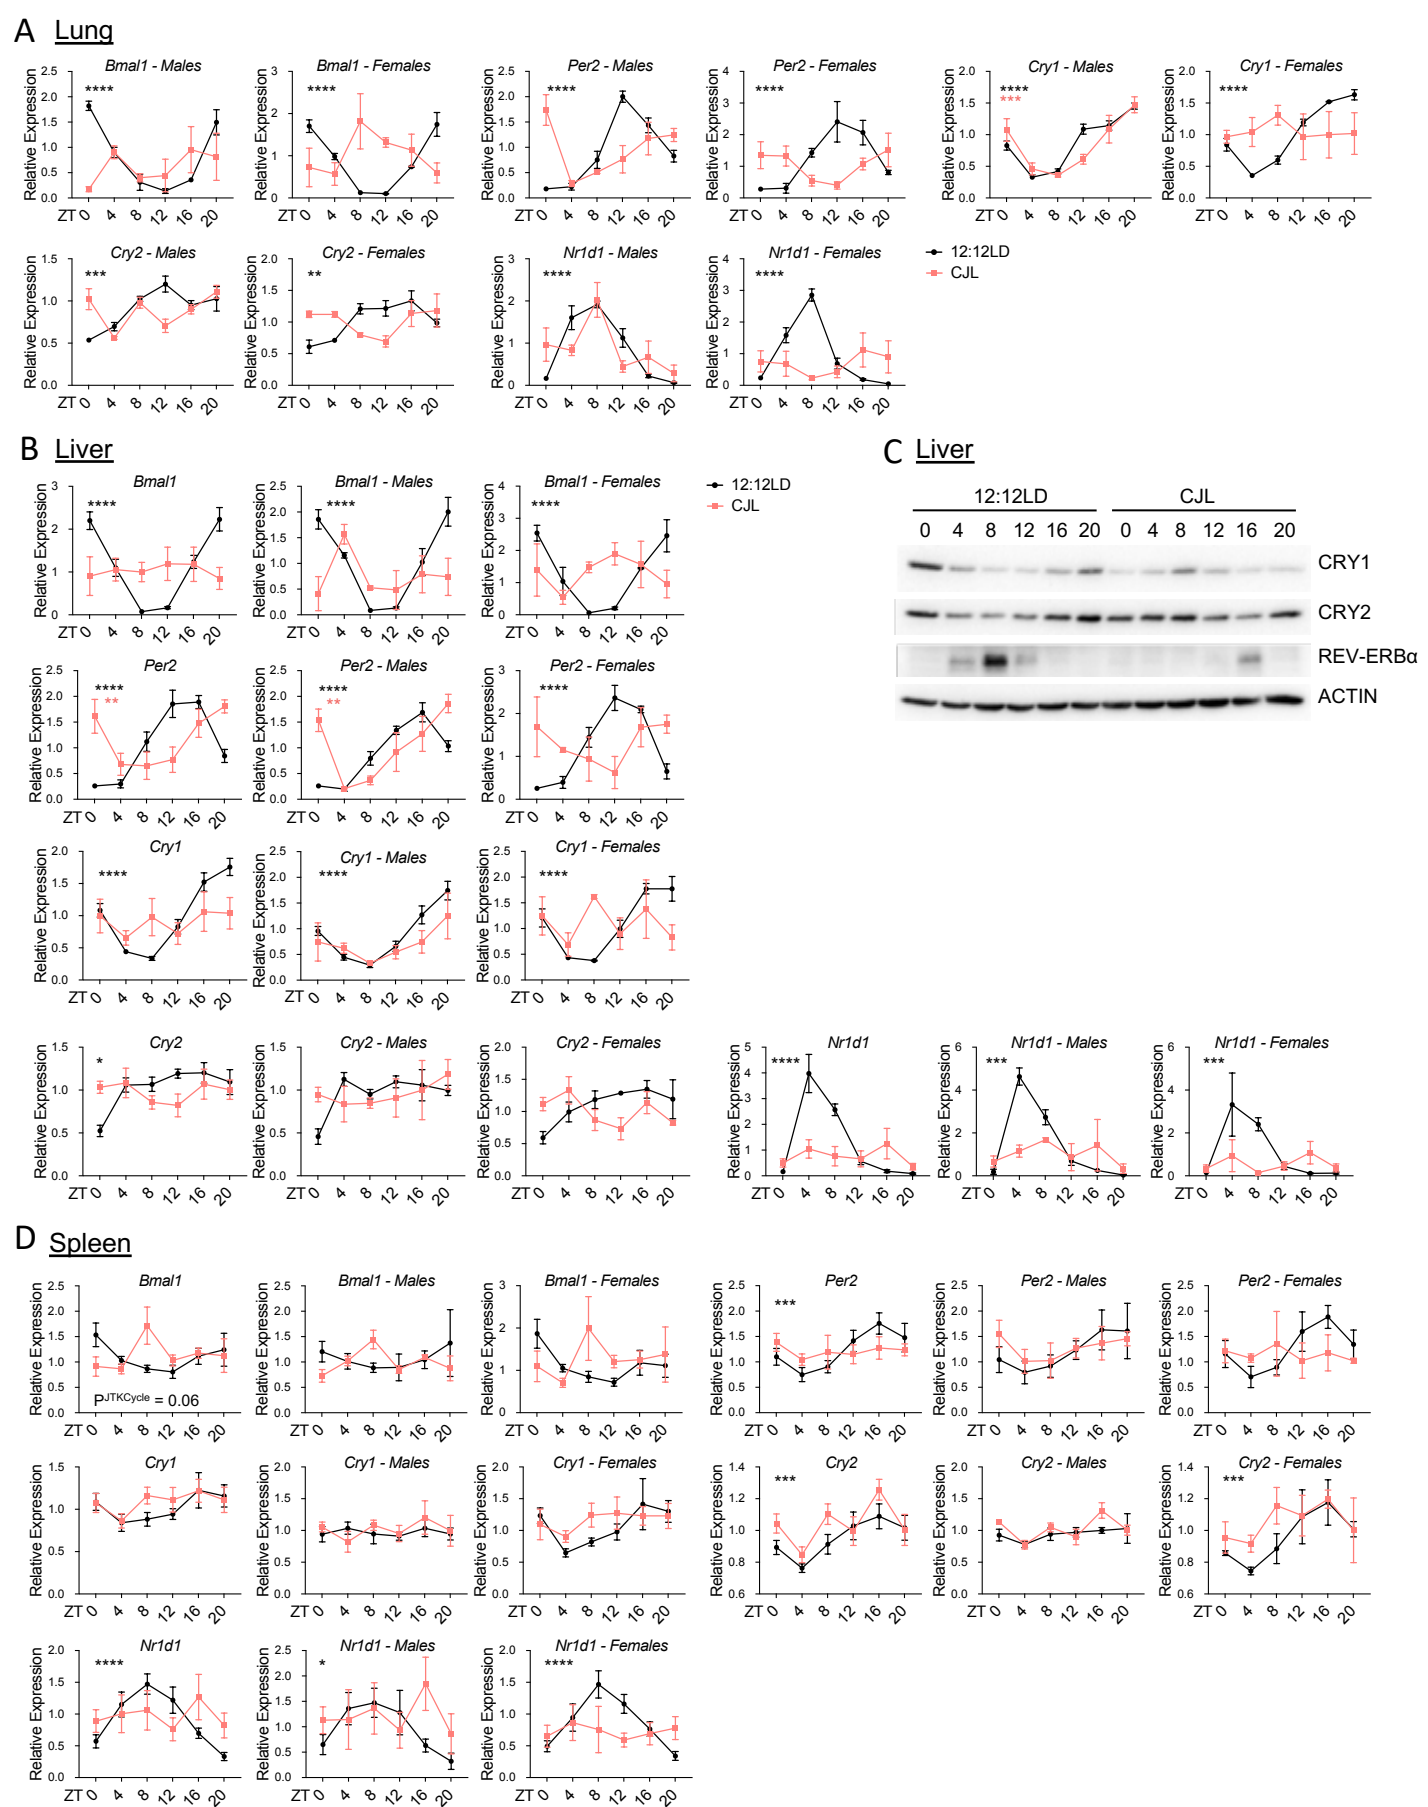

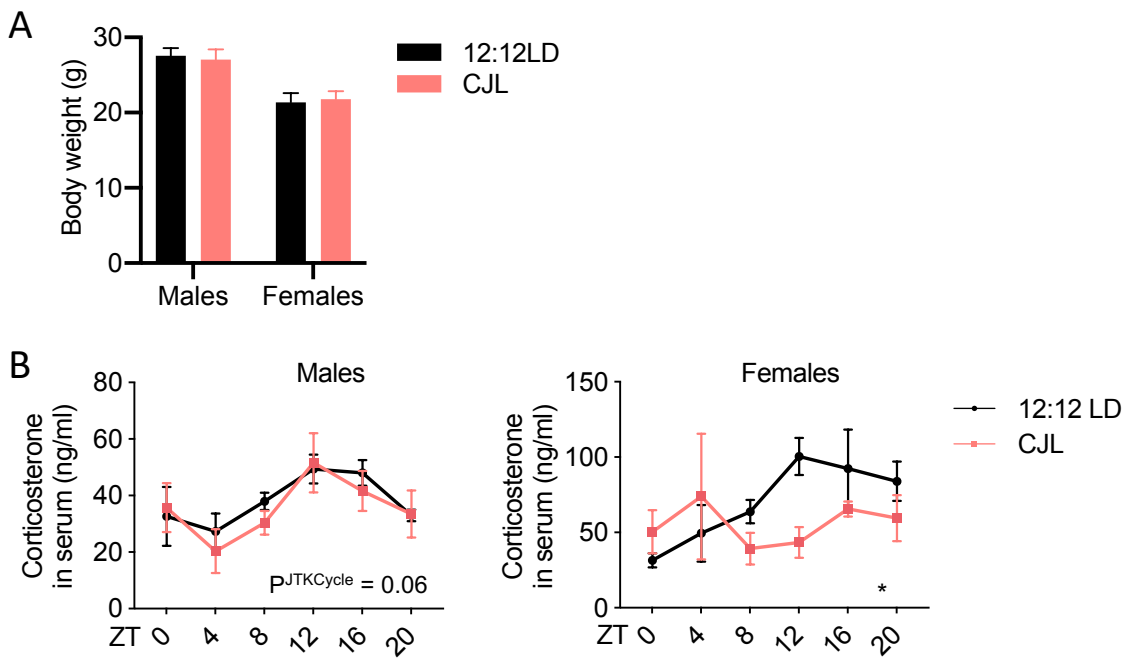

**Fig. S2. Body weight and serum corticosterone levels from mice housed in 12:12LD or chronic jetlag (CJD) conditions.** C57BL/6J male and female mice were housed in 12:12LD or CJD for 8 weeks. **(A)** Weights were recorded prior to euthanasia. **(B)** Corticosterone levels in serum were measured from blood samples collected at the indicated times (hours after lights on) on Day 1 of the schedule shown in Fig. 1A. Data represent mean  $\pm$  SEM for 3 males and 3 females per time point and light condition. Rhythmicity was determined by JTK\_Cycle analyses;  $*p_{JTKCycle} < 0.05$ .

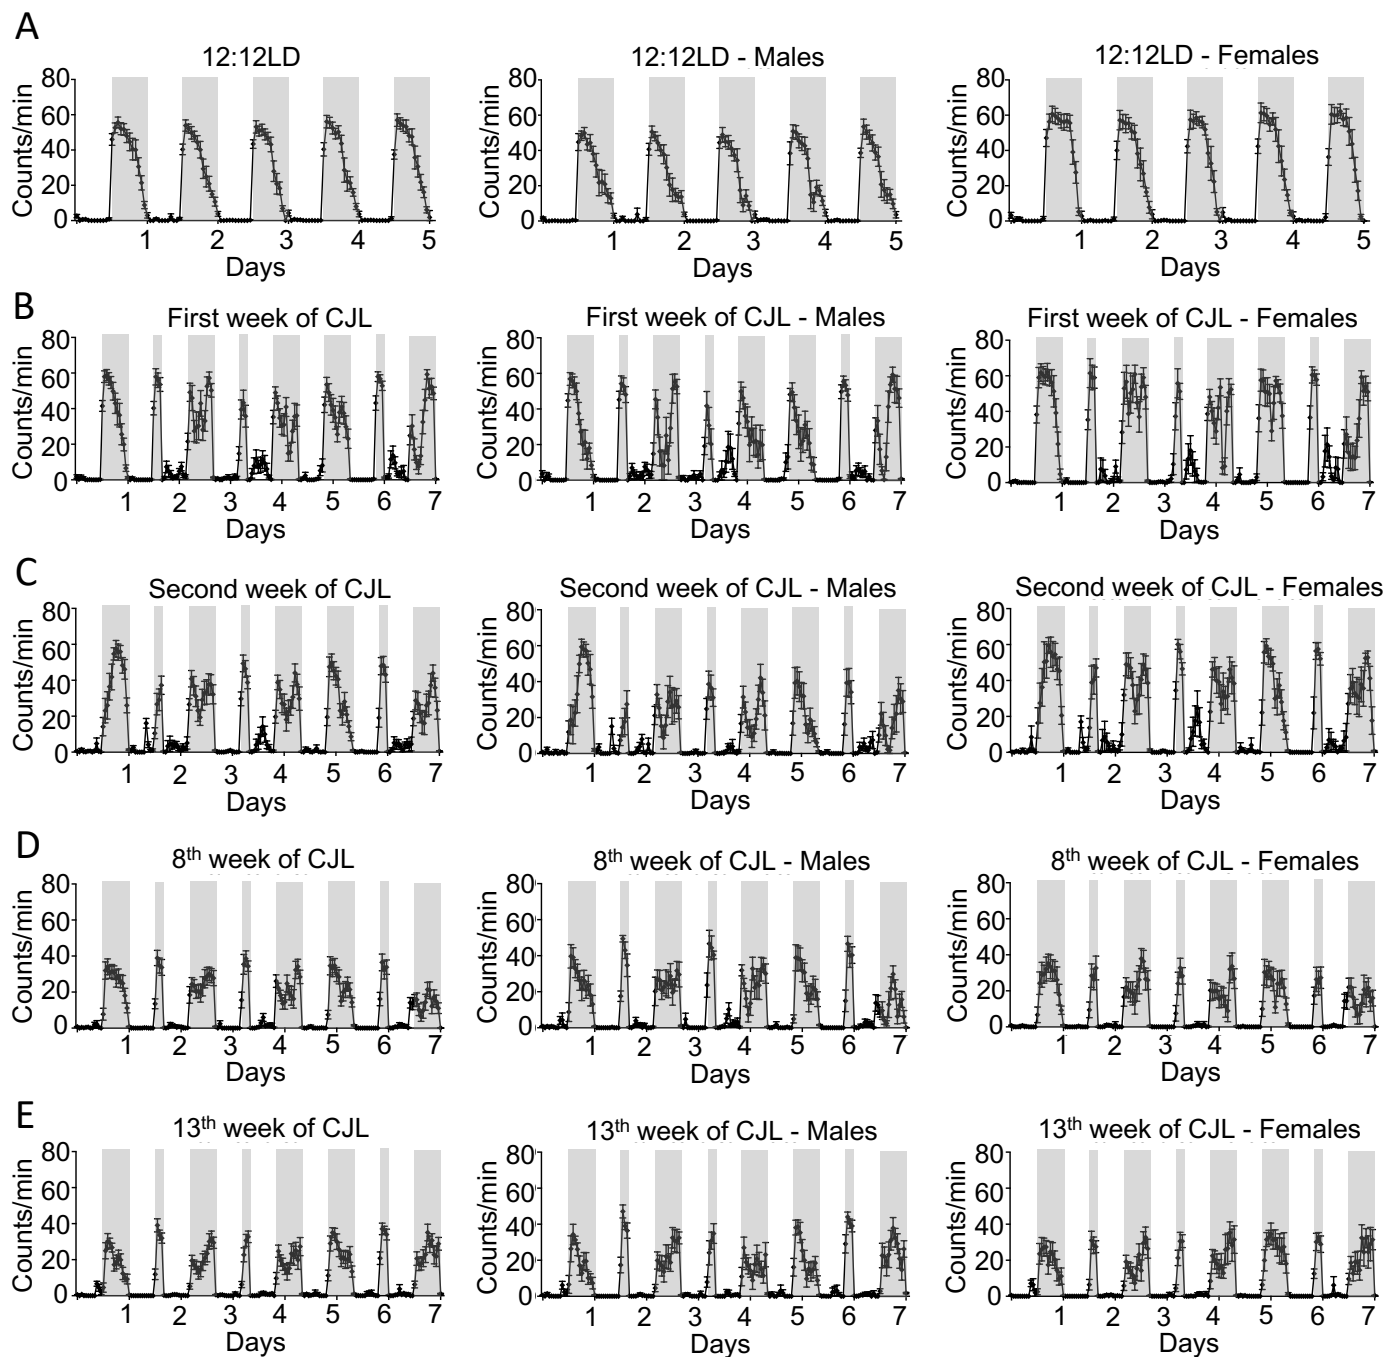

**Fig. S3. Wheel-running activity.** (A-E) 8-weeks old C57BL/6J male and female mice were housed in 12:12LD for 2 weeks and then in CJL for 13 weeks in presence of a running wheel. Group mean waveforms of wheel running activity for the last 5 days in 12:12LD (A), first (B), second (C), eighth (D) and thirteenth (E) week in CJL conditions. Data represent mean  $\pm$  SEM for 8 males and 8 females, plotted together or separately. Grey rectangles represent dark phases.

**A**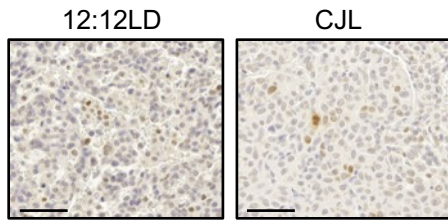**B**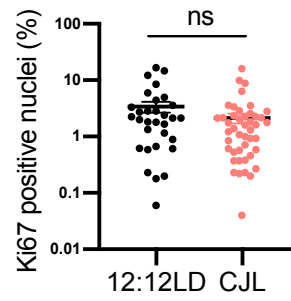

**Fig. S4. Ki67 protein levels in tumors from K mice exposed to CJL or normal light conditions.** Five weeks post-infection with lentivirus-Cre, K mice were placed in either 12:12LD or CJL for 20 weeks. **(A)** Representative Ki67 IHC images in tumors from K mice sacrificed at ZT5; scale bar, 50  $\mu$ m. **(B)** Quantitation of stained positive nuclei.

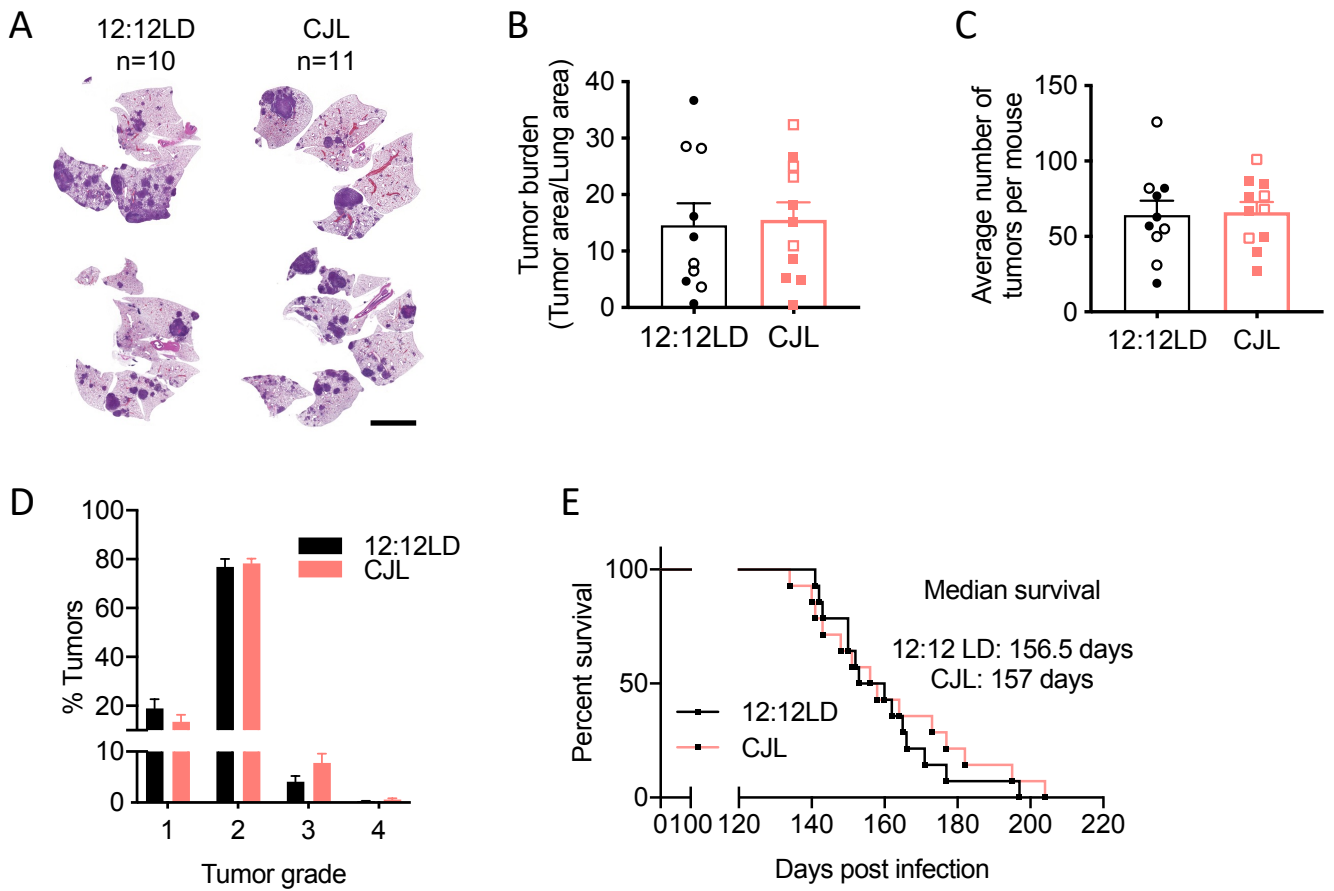

**Fig. S5. Tumor burden and overall survival in KP mice exposed to 12:12LD or CJL.** Five weeks post-infection with lentivirus-Cre, KP mice were placed in either 12:12LD or CJL for 10 weeks (A-D) or until signs of distress (E). (A) Representative H&E-stained sections at endpoint; scale bar, 5000  $\mu$ m. Tumor burden (B), numbers (C), and grade (D) were assessed from H&E sections. Column data represent mean  $\pm$  SEM. Values for individual animals are plotted, clear and filled symbols represent males and females respectively. (E) Kaplan-Meier survival analysis for K mice placed in 12:12LD (n = 14) or CJL (n = 14) conditions.

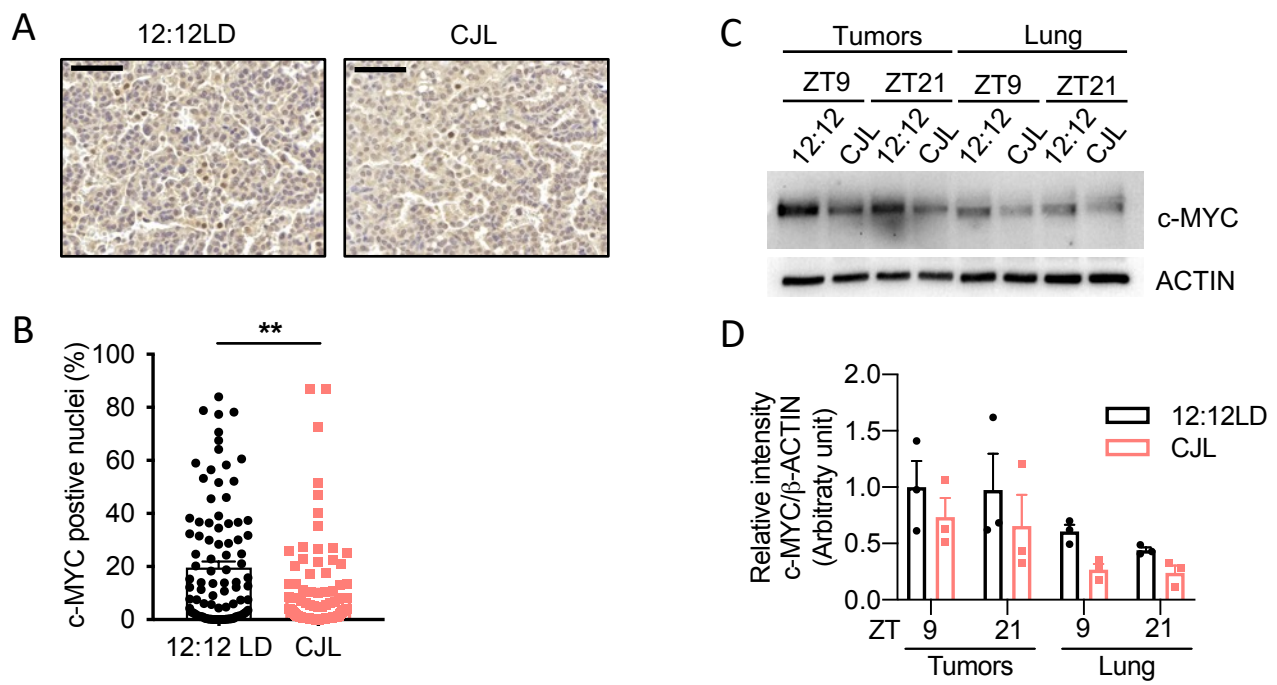

**Fig. S6. c-MYC protein levels in tumors and lungs from K mice exposed to CJL or normal light conditions.** Five weeks post-infection with lentivirus-Cre, K mice were placed in either 12:12LD or CJL for 20 weeks. **(A)** Representative c-MYC IHC images in tumors from K mice sacrificed at ZT5; scale bar, 50  $\mu$ m. **(B)** Quantitation of stained positive nuclei. \*\* $P < 0.01$  by Mann-Whitney test. **(C)** c-MYC detected by immunoblot. Tumors and lungs for each light condition and time point on the blot were from the same animal. Representative images were taken from  $n = 3$  biological replicates. **(D)** Quantitation of (C).

**A**

Pathways: MSigDB Hallmark 2020

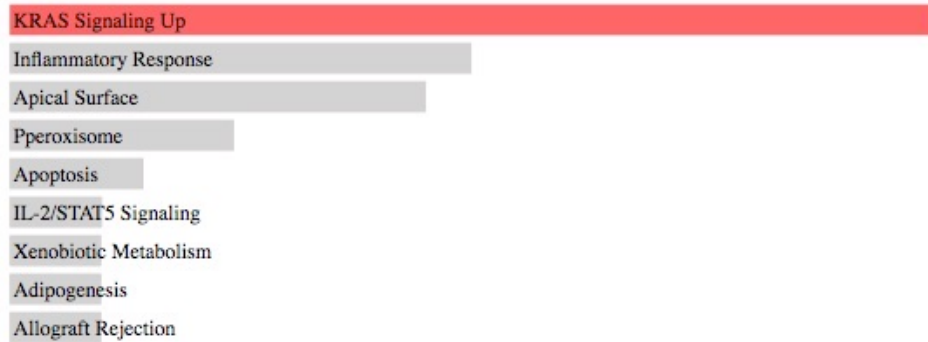

**B**

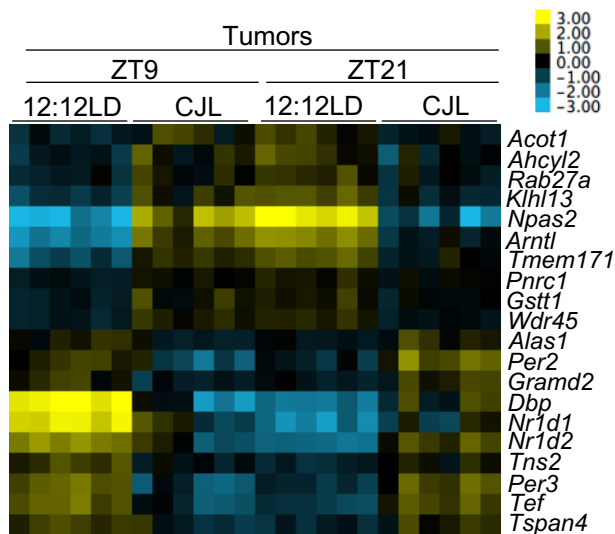

**C**

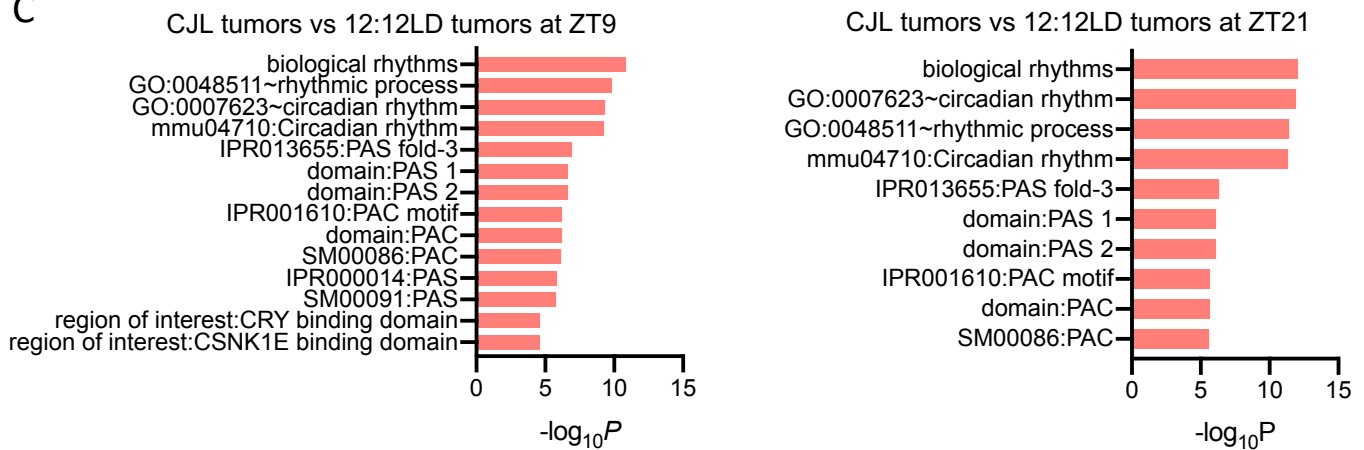

**Fig. S7. RNA-seq data analyses on lungs and tumors collected from K mice exposed to 12:12LD or CJL.** Five weeks post-infection with lentivirus-Cre, K mice were placed in either 12:12LD or CJL for 20 weeks. (A) Enrichr Pathway analysis of the upregulated genes in tumors compared to whole lungs (48 genes with  $\log_2\text{FoldChange} \geq 1.5$ ), all conditions combined, sorted by p-value ranking. Colored bar correspond to terms with significant p-values ( $< 0.05$ ). (B) Heatmap of the 20 genes differentially expressed upon CJL versus 12:12LD in tumors at both ZT9 and ZT20. (C) DAVID analyses on the differentially expressed genes in tumors between 12:12LD and CJL. Only terms with  $\text{FDR} < 0.25$  are shown.



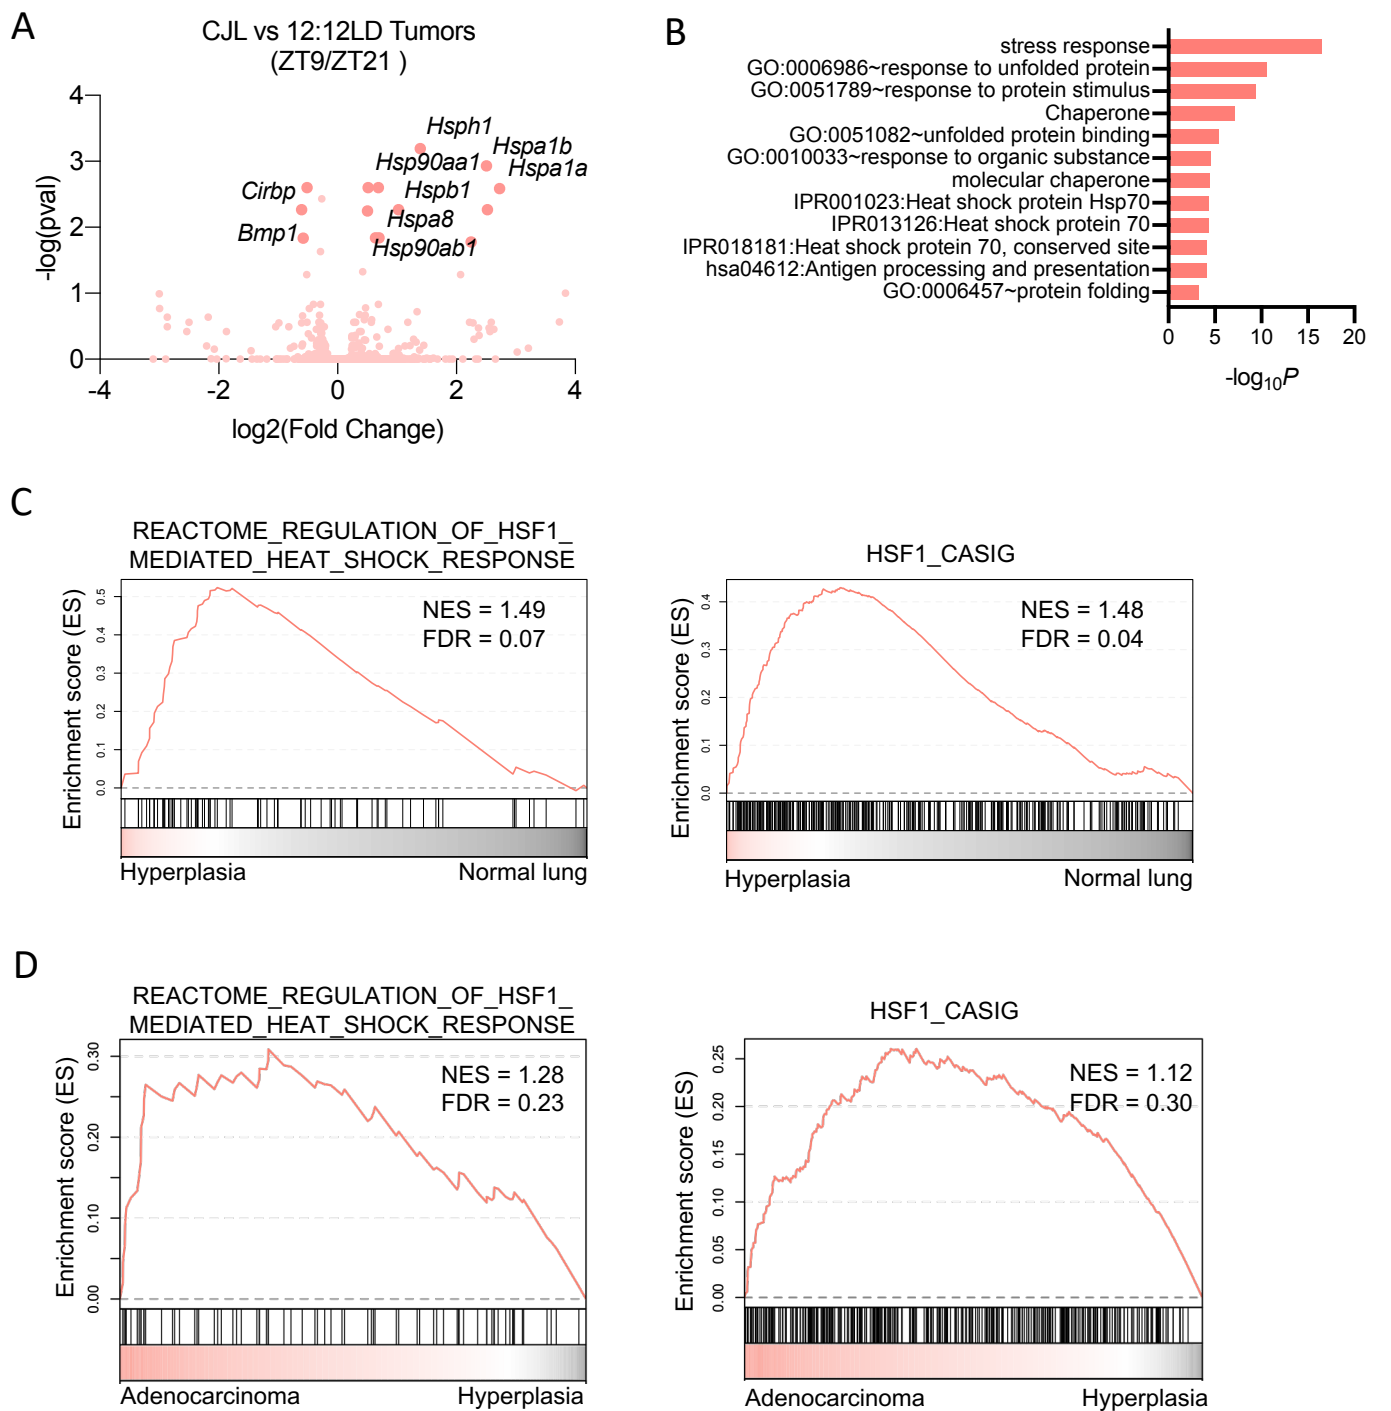

**Fig. S8. Up-regulation of HSF1-mediated heat shock response and cancer signature in mouse models of Kras-driven lung cancer.** (A,B) Five weeks post-infection with lentivirus-Cre, K mice were placed in either 12:12LD or CJL for 20 weeks. (A) Volcano plots of differentially expressed genes between 12:12LD and CJL by DESeq2 analyses for tumors only, taking time of collection (ZT9/21) as confounding factor. (B) DAVID analyses on the differentially expressed genes by DESeq2 in tumors between 12:12LD and CJL, taking time of collection as confounding factor. Only terms with FDR < 0.25 are shown. (C-D) GSEA plots for the HSF1-mediated heat shock response reactome and HSF1-Cancer signature gene sets applied to microarray data of laser-capture microdissected hyperplastic or normal lung cells (52) (C) and adenocarcinoma or hyperplastic lesions (D) from K-Ras<sup>G12V</sup> mice.

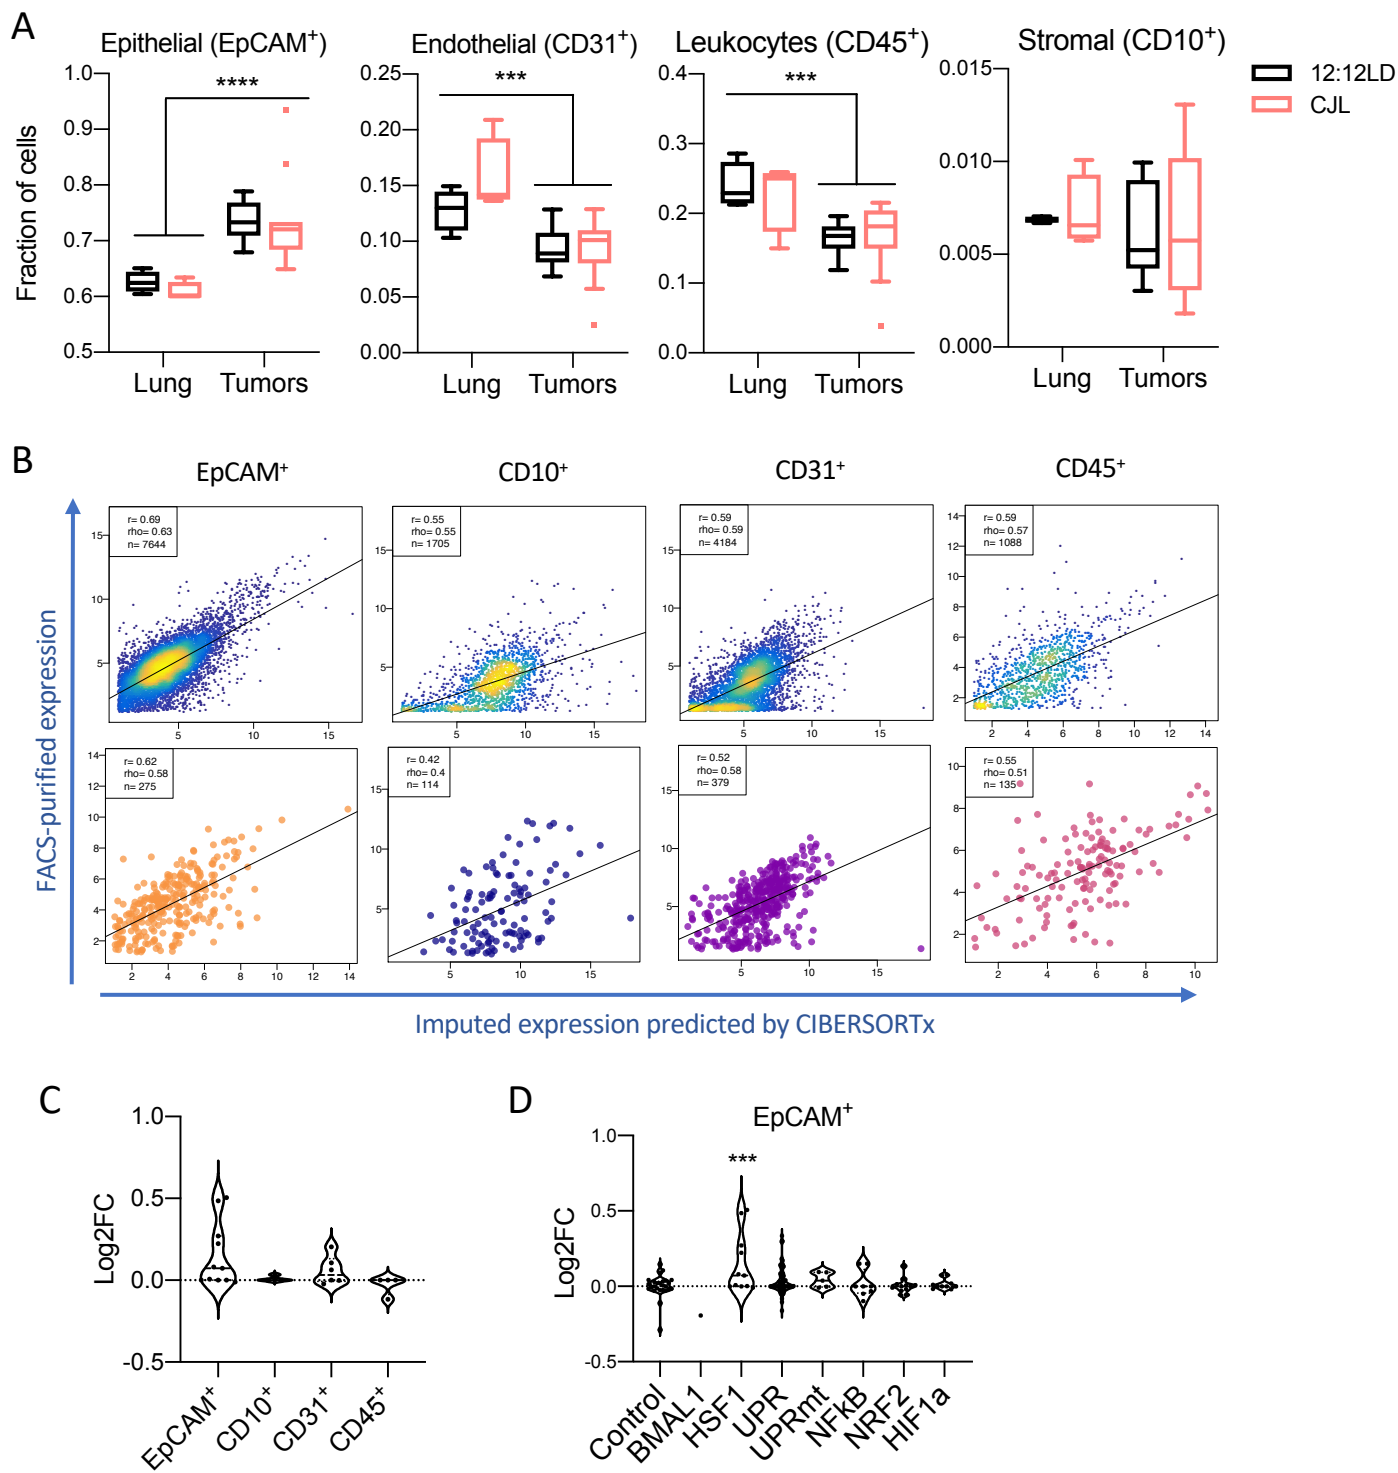

**Fig. S9. Cell fractions and imputed expression in tumors and whole lung samples from K mice. (A)** Imputed cell fractions from deconvolution of our RNA-sequencing data using CIBERSORTx and sigmatrix\_NSCLC. **(B)** Scatter plots comparing expression profiles of mathematically purified (x axis) and observed expression values in a control “groundtruth” dataset (top) or in the signature matrix (sigmatrix\_NSCLC; bottom) from RNA sequencing performed in FACS-sorted samples from human non small cell lung cancer biopsies. **(C)** Visualization of mean group fold changes of imputed expression of genes established as selective targets of HSF1 stress pathway (49) in each cell type. **(D)** Visualization of mean group fold changes of imputed expression of genes established as selective targets of each stress pathways (49) or “BMAL1-pathway” (43) in EpCAM<sup>+</sup> cells. \*\*\* P < 0.001 by one-Way ANOVA with Dunnett’s multiple comparison test. Note: Transcripts (including *Hspa1a*, *Hspa1b*, and several BMAL1 targets) for which expression could not be reliably imputed are omitted.

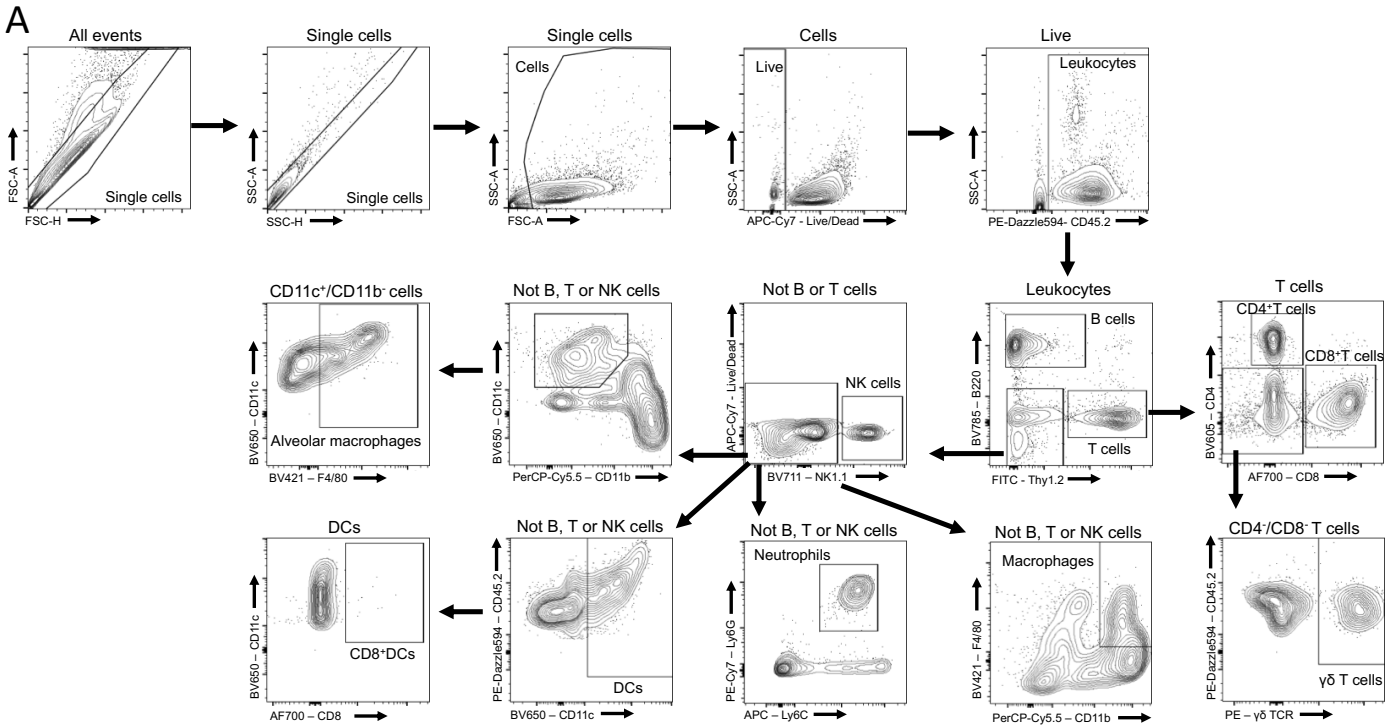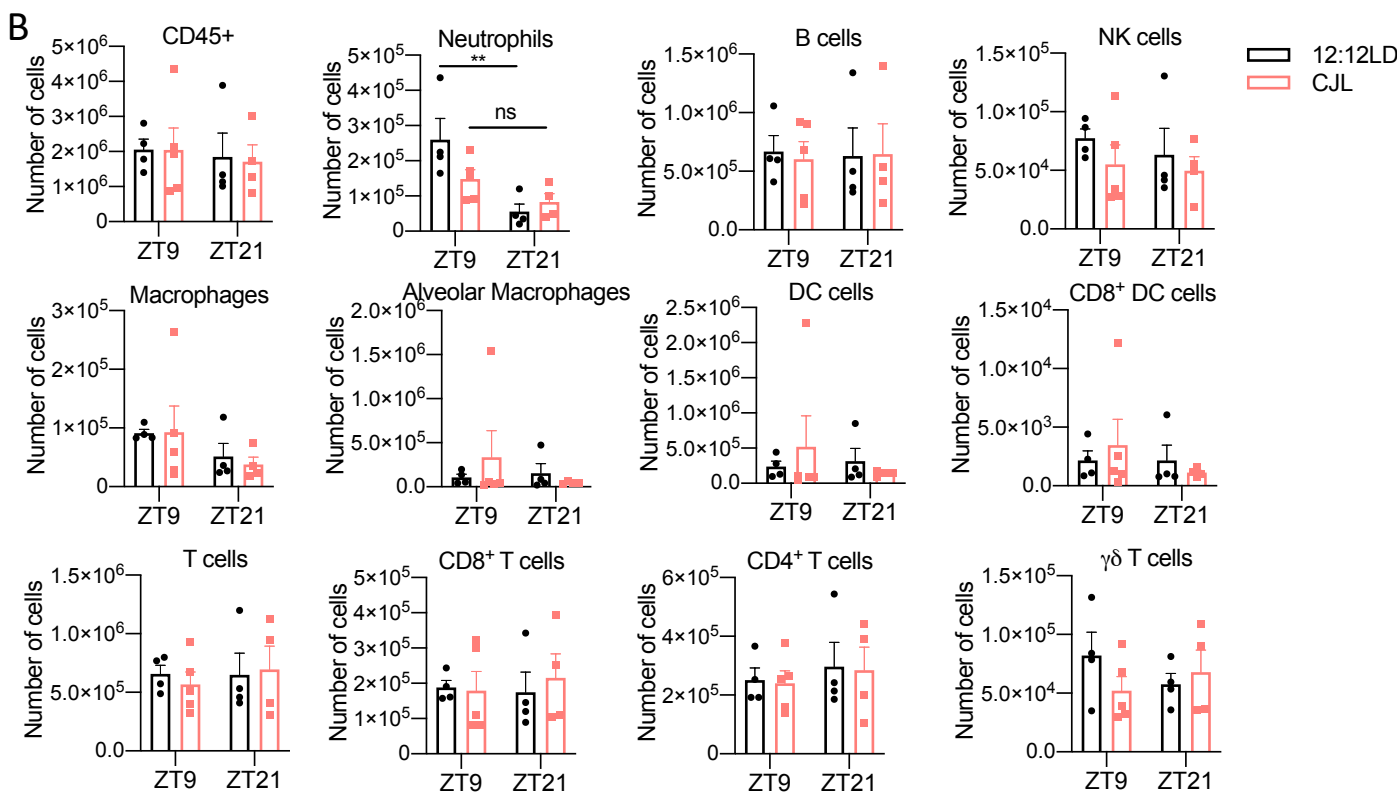

**Fig. S10. Flow cytometry gating strategy and immune cell numbers.** Five weeks post-infection with lentivirus-Cre, K mice were placed in either 12:12LD or CJL for 20 weeks. **(A)** Flow cytometry gating strategy. **(B)** Immune cell counts.  $n=4$  for each time time point and lightning condition.  $**P < 0.01$  by two-Way ANOVA, post hoc Bonferroni test.

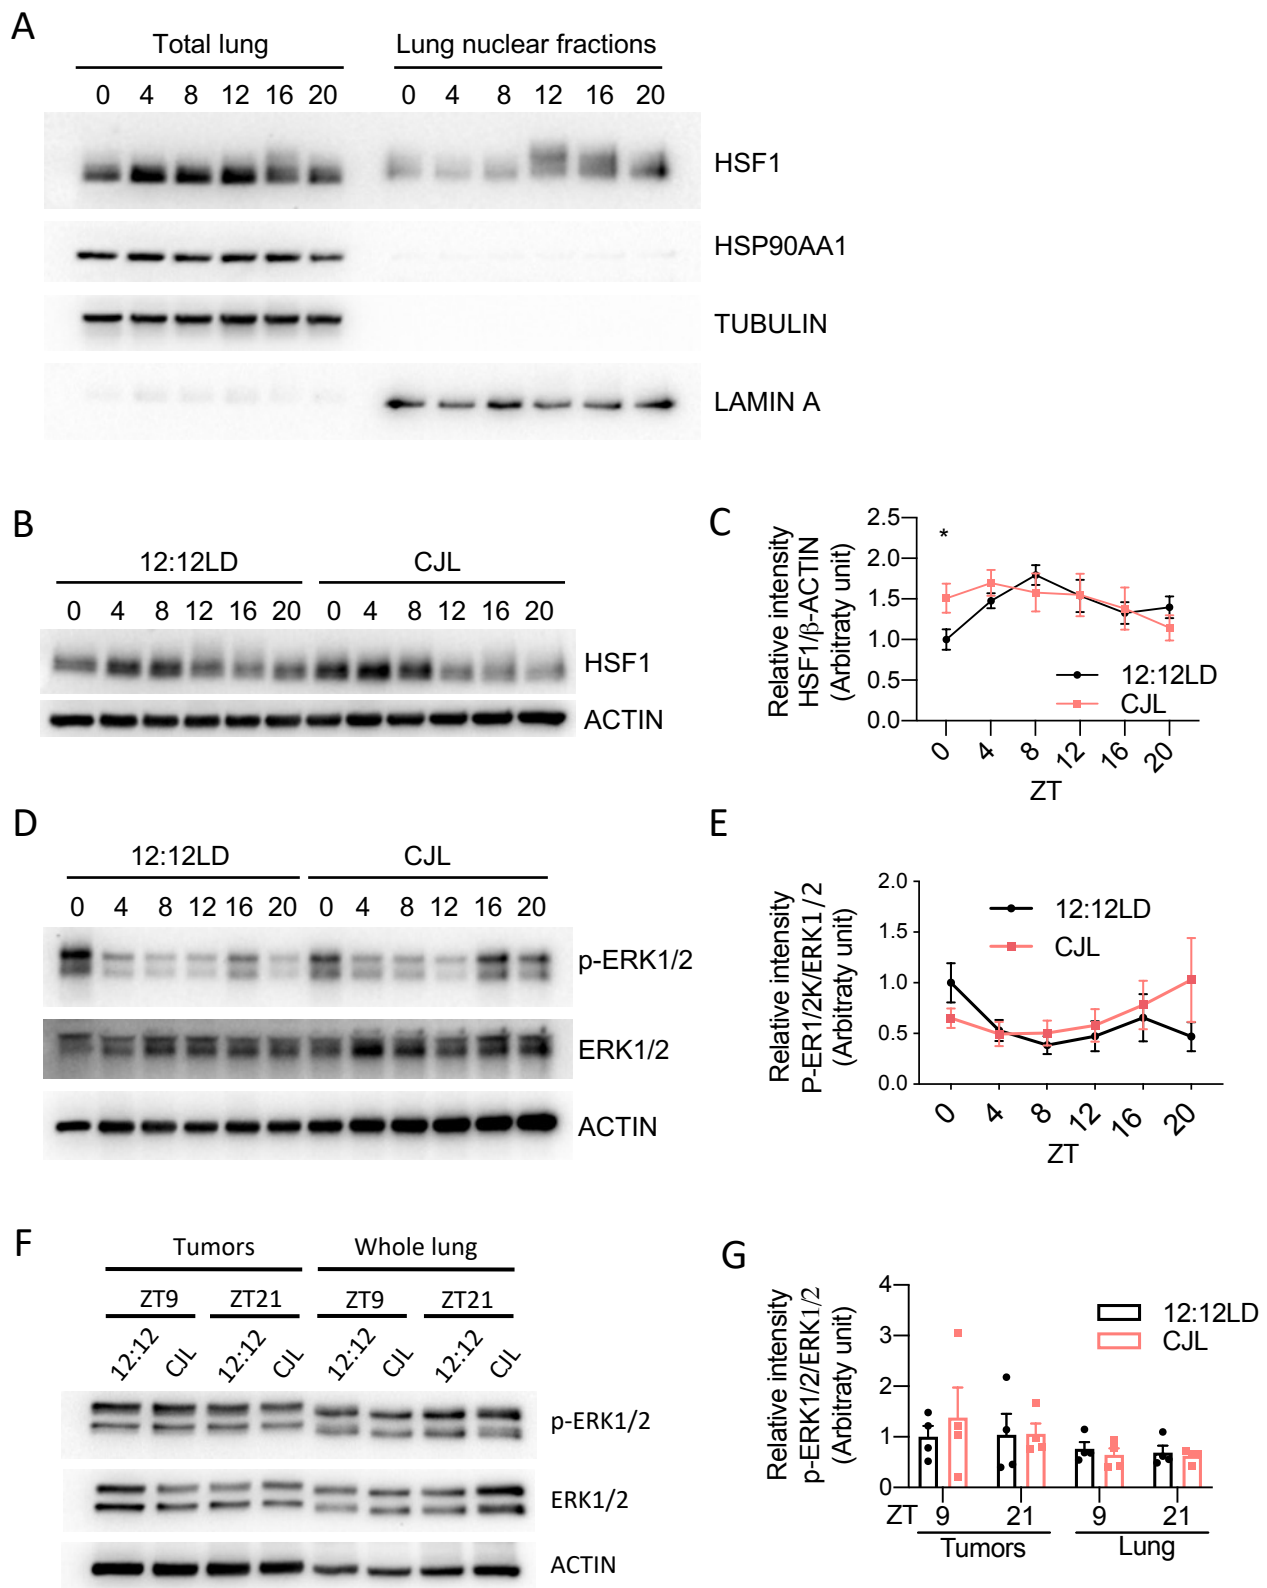

**Fig. S11. HSF1 protein levels in lung.** (A) Proteins from whole lung or lung nuclear extracts detected by immunoblot from C57BL/6J mice housed in 12:12LD for 8 weeks. Lung tissues were collected at the indicated times (hours after lights on). Each lane on the Western blot represents a sample prepared from a unique animal. (B,D) Proteins from whole lungs detected by immunoblot from the same cohort of C57BL/6J as in Fig. 1. Each lane on the Western blot represents a sample prepared from a unique animal. Representative images were taken from  $n = 3$  biological replicates. (C,E) Quantitation of (B) and (D) respectively. Rhythmicity was determined by JTK\_Cycle analyses;  $*P^{\text{JTKCycle}} < 0.05$ . (F) Proteins detected by immunoblot from tumors and lung tissue from K mice housed in 12:12LD or CJL for 20 weeks. Tumors and lungs for each light condition and time point on the blot were from the same animal. Representative images were taken from  $n = 4$  biological replicates. (G) Quantitation of (F).

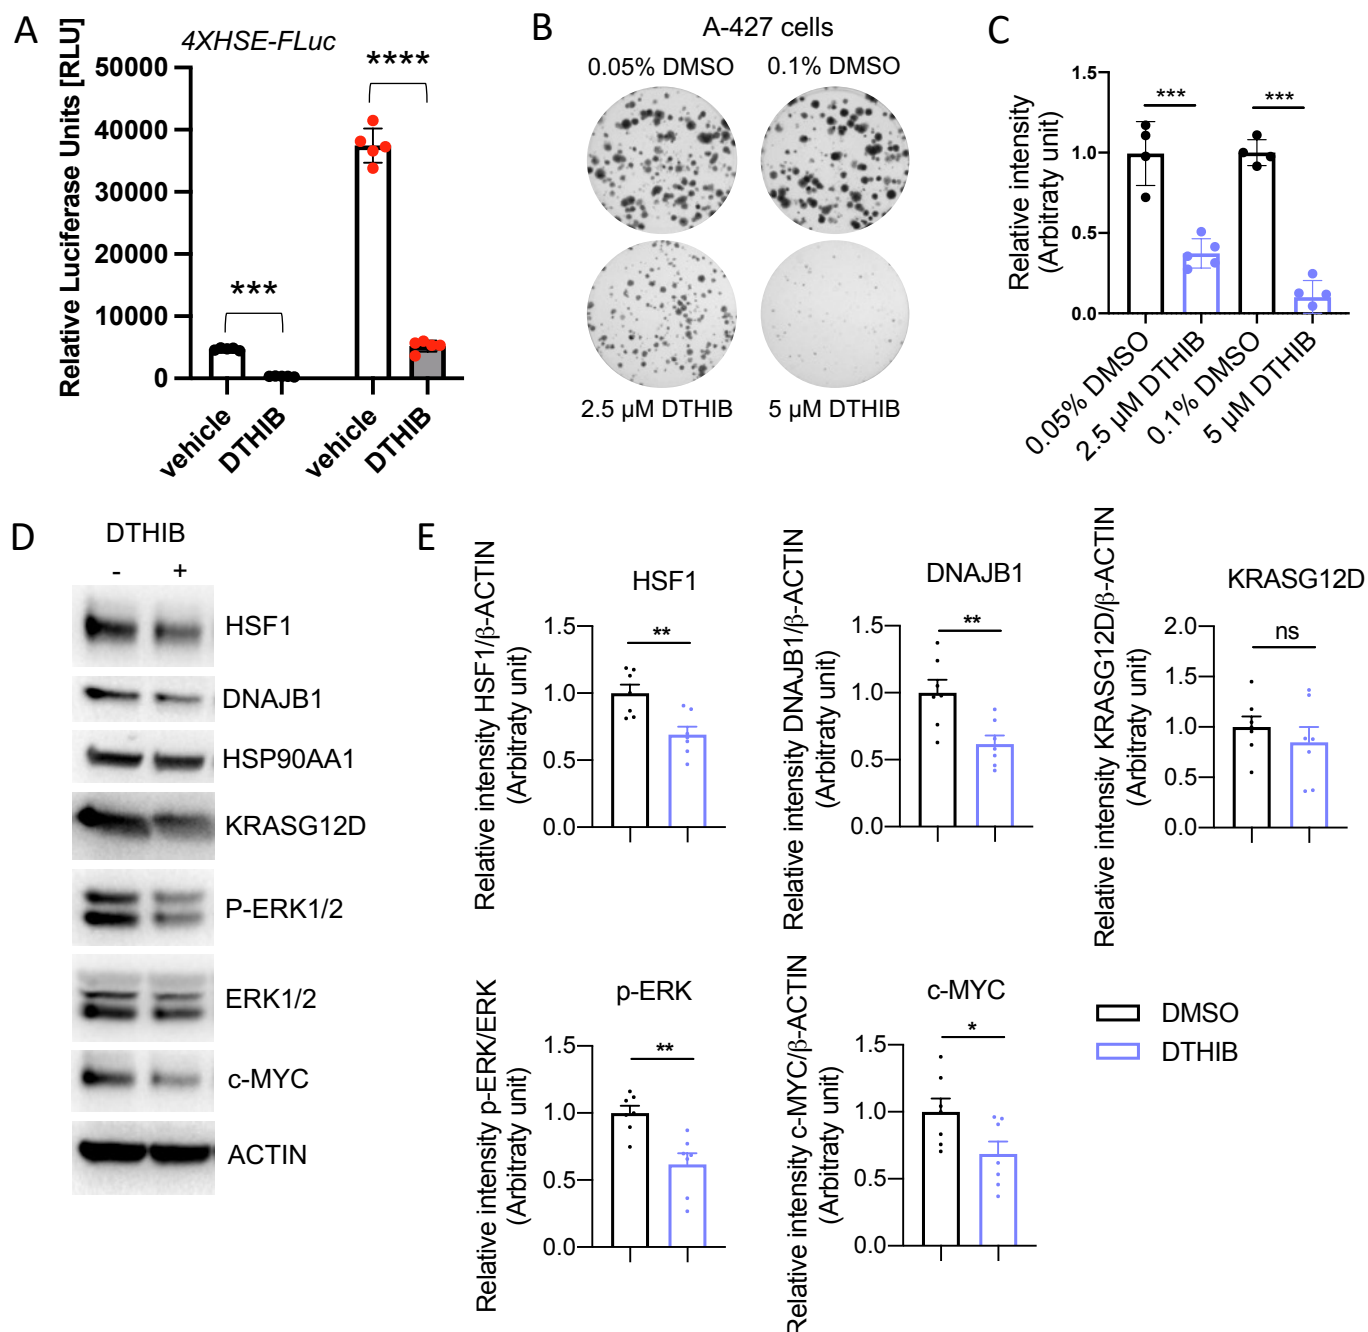

**Fig. S12. Pharmacological inhibition of HSF1 using DTHIB.** (A) Relative luciferase activity in HEK293T cells stably expressing the reporter *pGL4.41Luc2P/4XHSE/Hygro* and treated with vehicle (black symbols) or the HSF1 activator A3 (red symbols) and vehicle (open bars) or 5  $\mu$ M DTHIB (filled gray bars). \*\*\*  $P < 0.001$ , \*\*\*\*  $P < 0.0001$  by two-way ANOVA. (B) Representative images of crystal violet stained colonies formed by A-427 cells treated with DTHIB or vehicle DMSO 7 days after seeding, for 9 days. (C) Quantification of (B) from three biological replicates. Each condition was compared to controls that were plated in wells on the same plates. Bars represent mean  $\pm$  SD, \*\* $P < 0.01$  by student t-test. (D) Immunoblot of A-427 cells treated with 5  $\mu$ M DTHIB or 0.1% DMSO for 48h. Representative of  $n=7$ . (E) Quantitation of (D).

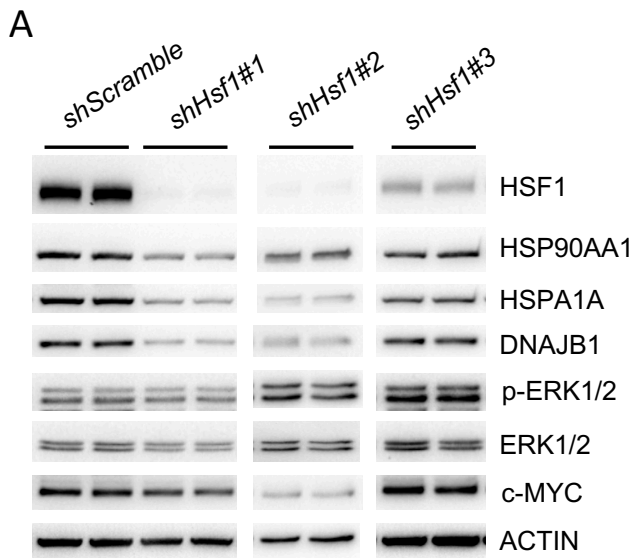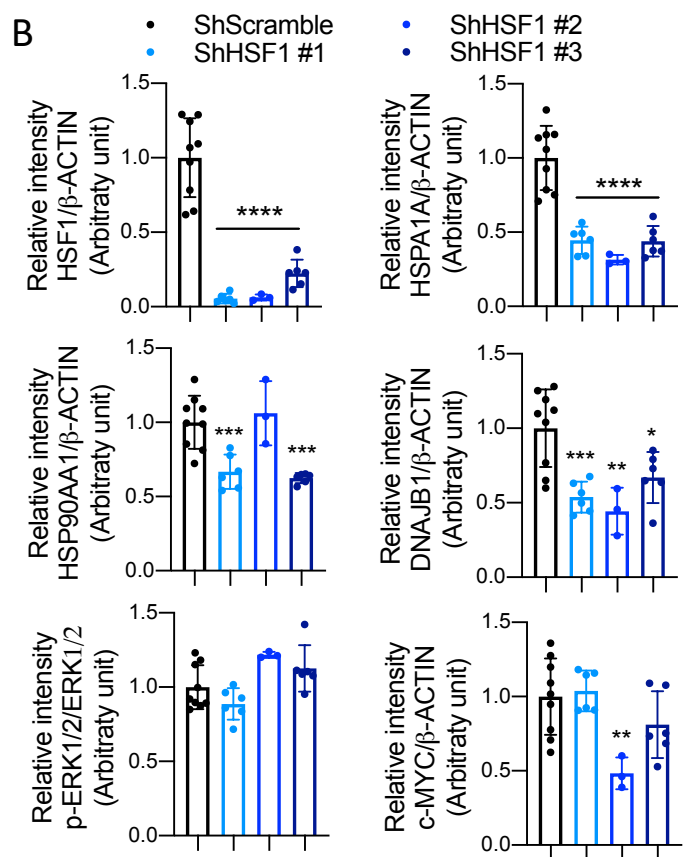

**Fig. S13. Genetic inhibition of HSF1 by shRNAs. (A)** Immunoblot of A-427 cells subjected to shRNAs targeting *HSF1*. Representative of n=3-6. **(B)** Quantitation of (A); bars represent mean  $\pm$  SD, \*P < 0.05, \*\*P < 0.01, \*\*\*P < 0.001, \*\*\*\*P < 0.0001 relative to ShScramble by one-way ANOVA, post hoc Bonferroni test.
